# Supplementary material for: Three Diverse Granule Preparation Methods for Proteomic Analysis of Mature Rice (Oryza sativa L.) Starch Grain
Source: MDPI journal article supplement (doi:10.3390/molecules27103307), 2022-05-21
Supplement: s1 [file s1]

**Supplementary Materials file**, for article in Molecules (mdpi)

Three Diverse Granule Preparation Methods for Proteomic Analysis of Mature Rice (*Oryza sativa* L.) Starch Grain

Zachary Provost, Ella Olivia Hansen, Morgan Viola Lynds, Barry S. Flinn, Zoran Minic, Maxim V. Berezovski and Illimar Altosaar\*

**\*Corresponding author:** Illimar Altosaar Email: [altosaar@uottawa.ca](mailto:altosaar@uottawa.ca) Tel: +1 (613) 804-1885

**This PDF file includes:**

Figures S1 to S5

Tables S1 to S6

Legends for Datasets S1 to S12

SI References

**Other supplementary materials include:**

Dataset S1

Dataset S2

Dataset S3

Dataset S4

Dataset S5

Dataset S6

Dataset S7

Dataset S8

Dataset S9

Dataset S10

Dataset S11

Dataset S12

**A**

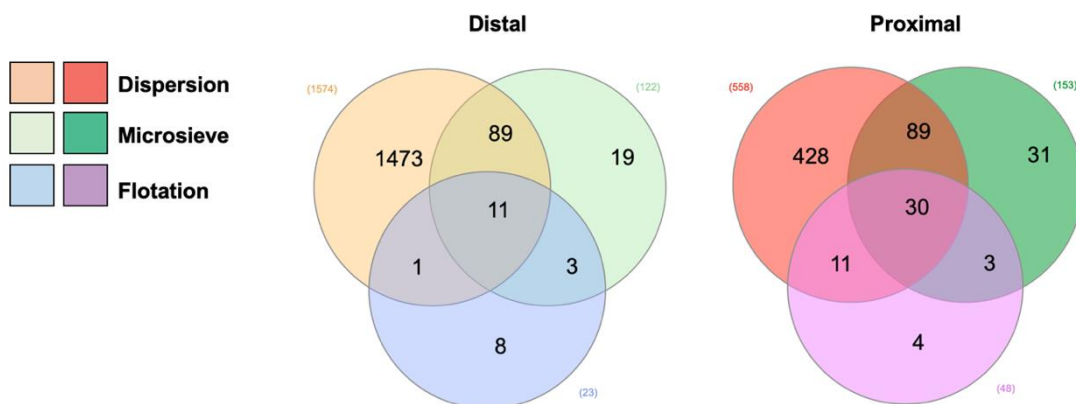

**B**

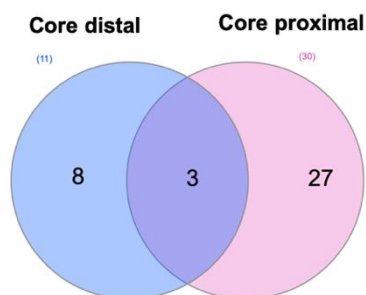

**Fig. S1** Common proteomes. **A** The common distal proteome represents proteins identified following trypsin-shaving of the starch granules (left). The common proximal amyloome represents proteins found in all three supernatants following isopropanol-solubilization of residual peptides (right). Figures generated using InteractiVenn (interactivenn.net) (Heberle et al. 2015). **B** Common proteins in the core distal proteome and core proximal amyloome



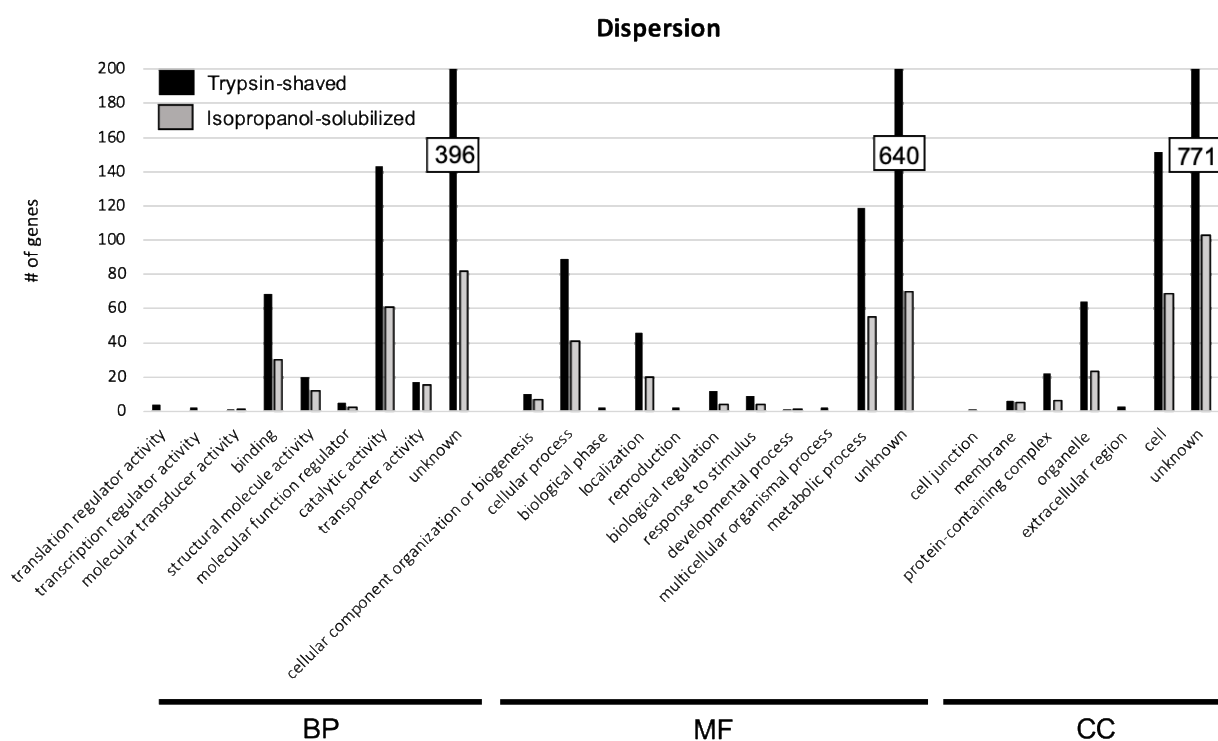

**Fig. S3** Gene ontology (GO) categorization of uncharacterized starch granule-associated proteins (SGAPs) extracted from dispersion-method prepared granules. Bar charts generated using Gene Ontology (GO) Enrichment Analysis powered by Panther (Mi et al. 2018). BP, biological process. MF, molecular function. CC, cellular compartment

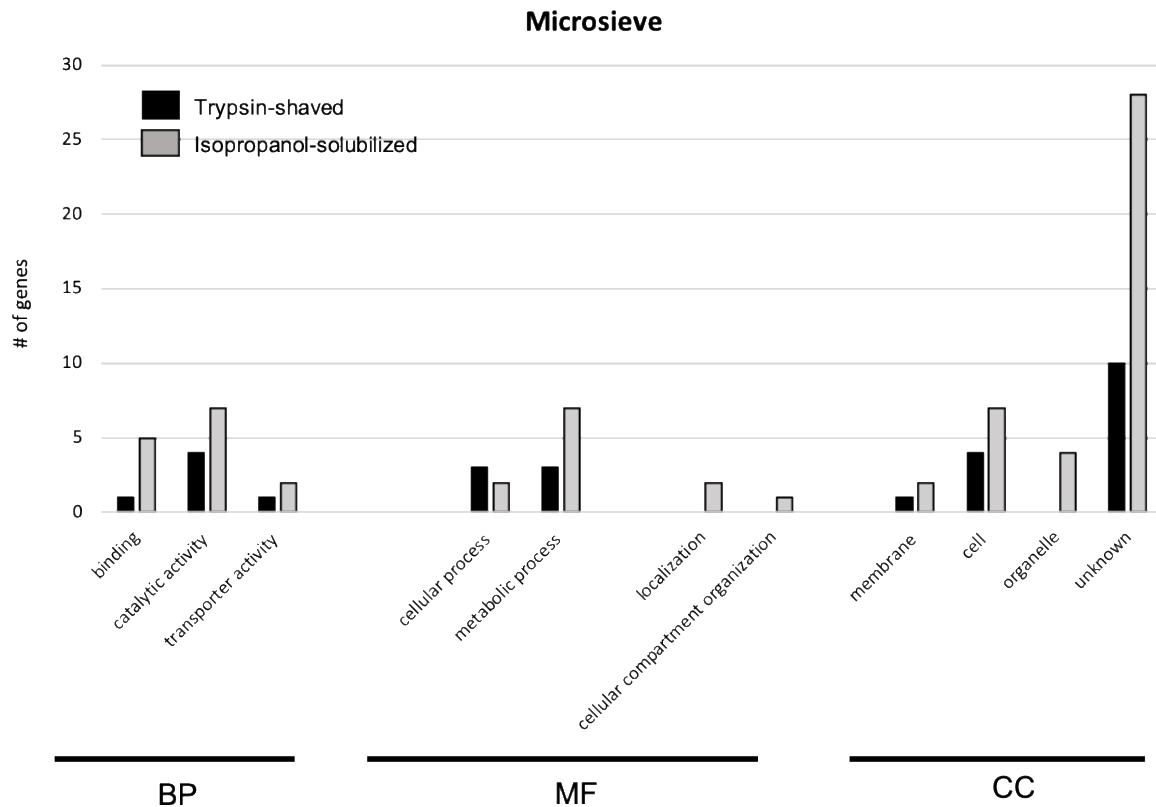

**Fig. S4** Gene ontology (GO) categorization of uncharacterized starch granule-associated proteins (SGAPs) extracted from microsieve-prepared granules. Bar charts generated using Gene Ontology (GO) Enrichment Analysis powered by Panther (Mi et al. 2018). BP, biological process. MF, molecular function. CC, cellular compartment

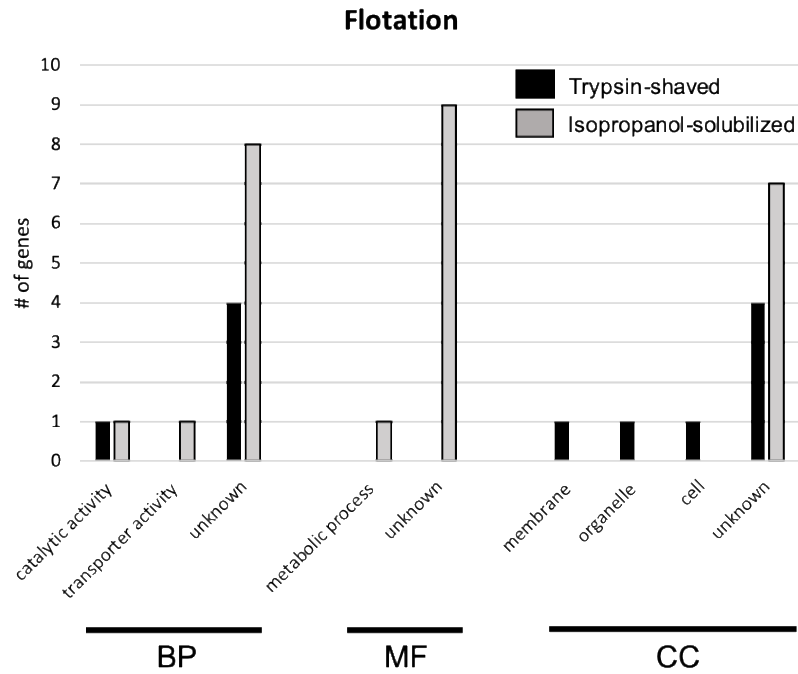

**Fig. S5** Gene ontology (GO) categorization of uncharacterized starch granule-associated proteins (SGAPs) extracted from flotation-prepared granules. Bar charts generated using Gene Ontology (GO) Enrichment Analysis powered by Panther (Mi et al. 2018). BP, biological process. MF, molecular function. CC, cellular compartment

**Table S1** Uncharacterized proteins in the distal proteome of dispersion-prepared granules

| UniProt ID                                     | Description                                                | Score  | Coverage (%) <sup>a</sup> | # peptides <sup>b</sup> |
|------------------------------------------------|------------------------------------------------------------|--------|---------------------------|-------------------------|
| <b>Amino acid biosynthesis</b>                 |                                                            |        |                           |                         |
| Q5N9Z8                                         | Bifunctional aminotransferase                              | 31.092 | 28.3843                   | 7(7)                    |
| Q8LRJ4                                         | Peptide-N4-(N-acetyl-beta-glucosaminyl) asparagine amidase | 7.2003 | 4.49438                   | 2(2)                    |
| Q5NBQ1                                         | Histidine biosynthesis bifunctional protein                | 6.6319 | 6.53595                   | 1(1)                    |
| Q9FTU2                                         | Replication protein A, class 2b aminoacyl-tRNA synthetase  | 5.7891 | 26.9503                   | 3(3)                    |
| Q8LR75                                         | Triosephosphate isomerase                                  | 3.9846 | 12.5490                   | 1(1)                    |
| Q5N7G9                                         | Membrane trafficking regulatory protein                    | 1.4680 | 3.00752                   | 1(1)                    |
| <b>Biosynthesis of secondary metabolites</b>   |                                                            |        |                           |                         |
| Q5N7Y9                                         | Hydroxyphenylpyruvate reductase                            | 4.4002 | 7.91139                   | 1(1)                    |
| <b>Carbohydrate metabolism</b>                 |                                                            |        |                           |                         |
| Q0JKM8                                         | Aspartic proteinase oryzasin-1-like                        | 75.502 | 27.2031                   | 11(11)                  |
| Q9AWZ5                                         | Late embryogenesis abundant protein Lea14-A                | 22.648 | 49.0066                   | 5(5)                    |
| <b>Light response</b>                          |                                                            |        |                           |                         |
| Q0JNL8                                         | Cop9 signalosome complex subunit 2                         | 6.2640 | 6.15034                   | 2(2)                    |
| <b>Lipid metabolism</b>                        |                                                            |        |                           |                         |
| Q5SNJ4                                         | Metalloprotease                                            | 32.130 | 27.5247                   | 7(7)                    |
| Q94E74                                         | Adenine nucleotide alpha hydrolases-like                   | 19.974 | 54.4910                   | 4(4)                    |
| Q9FTG9                                         | Acyl transferase 9-like                                    | 7.6716 | 5.89623                   | 2(2)                    |
| Q5ZC86                                         | Glutathione S-transferase 4                                | 7.3226 | 13.3333                   | 2(2)                    |
| Q5QM39                                         | Cinnamoyl-CoA reductase 1                                  | 3.1384 | 3.57143                   | 1(1)                    |
| <b>Membrane-associated</b>                     |                                                            |        |                           |                         |
| Q0JQX6                                         | Plastidic glucose transporter 4                            | 41.588 | 19.7417                   | 7(7)                    |
| Q9LGA3                                         | Transmembrane protein 214                                  | 30.311 | 22.1843                   | 8(8)                    |
| Q9AS74                                         | Import inner membrane translocase subunit                  | 2.9880 | 5.52632                   | 1(1)                    |
| Q7F5L2                                         | Ectonucleotide pyrophosphatase                             | 1.8008 | 2.50522                   | 1(1)                    |
| Q94E23                                         | Probable receptor-like protein kinase                      | 1.1336 | 4.26829                   | 1(1)                    |
| <b>Miscellaneous</b>                           |                                                            |        |                           |                         |
| Q9AX15                                         | Probable cysteine desulfurase                              | 9.8278 | 4.38312                   | 2(2)                    |
| Q0JQ41                                         | Kinase                                                     | 9.7841 | 10.6267                   | 2(2)                    |
| Q5JMI5                                         | Altered inheritance of mitochondria protein 3              | 2.6716 | 2.86195                   | 1(1)                    |
| <b>Mitochondrial activity</b>                  |                                                            |        |                           |                         |
| Q9FU74                                         | MAM33 protein                                              | 24.130 | 20.7273                   | 4(4)                    |
| <b>Oxidoreductases</b>                         |                                                            |        |                           |                         |
| Q5ZBH8                                         | Probable aldo-keto reductase 1                             | 6.0404 | 13.9535                   | 3(3)                    |
| Q5SND7                                         | 2-oxoglutarate-Fe(II) type oxidoreductase                  | 4.2784 | 10.1796                   | 2(2)                    |
| <b>Protein trafficking</b>                     |                                                            |        |                           |                         |
| Q9LD54                                         | Envelope ADP, ATP carrier protein, chloroplastic           | 48.005 | 31.4961                   | 12(12)                  |
| Q9S7H0                                         | Syntaxin-22                                                | 3.0910 | 11.0714                   | 1(1)                    |
| <b>Stress response</b>                         |                                                            |        |                           |                         |
| Q5ZAV7                                         | Universal stress protein PHOS32                            | 20.984 | 31.2977                   | 4(3)                    |
| Q9AWU6                                         | WD repeat-containing protein 1                             | 16.142 | 10.1639                   | 4(4)                    |
| Q8RZ83                                         | Ras-related protein RABA1F                                 | 15.138 | 25.4464                   | 5(3)                    |
| Q8S292                                         | Universal stress protein PHOS32                            | 11.999 | 32.7160                   | 3(3)                    |
| Q0JLH6                                         | ATP synthase                                               | 3.4440 | 8.19672                   | 1(1)                    |
| Q9FTF3                                         | Rust resistance kinase LR10                                | 1.3689 | 3.38164                   | 1(1)                    |
| <b>Structural</b>                              |                                                            |        |                           |                         |
| Q5N7Z9                                         | Ras-related protein RAB7                                   | 15.134 | 39.1304                   | 5(3)                    |
| Q93W16                                         | GTP-binding protein SAR1A                                  | 12.110 | 27.9793                   | 3(2)                    |
| Q5N7E8                                         | Microtubule-binding motor protein                          | 9.2205 | 13.3080                   | 3(3)                    |
| Q5VR46                                         | Leucine-rich repeat extensin-like protein 3                | 3.1355 | 3.07692                   | 1(1)                    |
| Q8LQJ5                                         | NDR1/HIN1-like protein 6                                   | 2.4542 | 10.6529                   | 1(1)                    |
| Q5NBL8                                         | Klaroid, isoform A-related                                 | 1.6375 | 4.61538                   | 1(1)                    |
| <b>Transcriptional/translational machinery</b> |                                                            |        |                           |                         |
| Q5VRX8                                         | Glutamine-tRNA ligase                                      | 42.734 | 16.0804                   | 9(8)                    |
| Q94E63                                         | Alba chromosomal protein                                   | 21.989 | 38.8158                   | 6(5)                    |
| Q93WM3                                         | Asparagine-tRNA ligase, mitochondrial-related              | 15.599 | 11.9857                   | 5(5)                    |
| Q93VC6                                         | 40S ribosomal protein S5                                   | 12.038 | 20.0000                   | 5(5)                    |
| Q5NB69                                         | 60S acidic ribosomal protein p3-1-related                  | 11.599 | 22.6891                   | 3(3)                    |
| Q5SNH7                                         | 60S acidic ribosomal protein P2A                           | 8.6137 | 28.0702                   | 1(1)                    |
| Q5ZBA9                                         | RNA binding protein                                        | 5.5209 | 13.4921                   | 1(1)                    |
| A0A0P0V4C6                                     | piRNA biogenesis protein EXD1                              | 3.9738 | 25.5193                   | 3(3)                    |
| Q94EG1                                         | Aromatic aminotransferase ISS1                             | 3.1180 | 3.55330                   | 1(1)                    |
| <b>Ubiquitin-mediated proteolysis</b>          |                                                            |        |                           |                         |
| Q8W0I1                                         | Ubiquitin-conjugating enzyme E2 36                         | 16.798 | 47.7124                   | 5(5)                    |

<sup>a</sup>Percent protein sequence coverage by total peptides.<sup>b</sup>Number of total peptides (number of unique peptides).

**Table S2** Uncharacterized proteins in the proximal amyloyme of dispersion method-prepared starch granules

| UniProt ID                                     | Description                                                    | Score  | Coverage (%) <sup>a</sup> | # peptides <sup>b</sup> |
|------------------------------------------------|----------------------------------------------------------------|--------|---------------------------|-------------------------|
| <b>Amino acid biosynthesis</b>                 |                                                                |        |                           |                         |
| Q6Z782                                         | Amino acid transporter                                         | 83.887 | 38.8235                   | 15(15)                  |
| B9EVR3                                         | Amino acid transporter                                         | 14.773 | 31.3953                   | 3(3)                    |
| Q5N9Z8                                         | Bifunctional aspartate aminotransferase                        | 1.0181 | 3.27511                   | 1(1)                    |
| <b>Carbohydrate metabolism</b>                 |                                                                |        |                           |                         |
| Q0JKM8                                         | Aspartic proteinase oryzasin-1-like                            | 45.878 | 38.8889                   | 13(13)                  |
| Q0JG51                                         | Glycosyl hydrolase family 1                                    | 4.0659 | 12.2302                   | 1(1)                    |
| A0A0P0V7G8                                     | CD98 heavy chain, isoform D                                    | 1.2423 | 2.96804                   | 1(1)                    |
| <b>Lipid metabolism</b>                        |                                                                |        |                           |                         |
| Q6Z702                                         | 3-isopropylmalate dehydratase large subunit, chloroplastic     | 17.115 | 9.14397                   | 3(3)                    |
| Q9LGL5                                         | Decarboxylase                                                  | 5.2303 | 8.20770                   | 1(1)                    |
| Q6ZIH1                                         | Oxygenase                                                      | 4.4467 | 4.22265                   | 2(2)                    |
| B7F8Y9                                         | Soluble inorganic pyrophosphatase 4                            | 3.4419 | 7.83410                   | 1(1)                    |
| Q0DZN5                                         | Acetolactate synthase small subunit 1, chloroplastic           | 2.5613 | 5.58823                   | 1(1)                    |
| A0A0P0V2C9                                     | AlG1-like protein, 48352-49494-related                         | 2.0992 | 0.243355                  | 1(1)                    |
| Q5QM65                                         | Fatty acid export 3, chloroplastic                             | 2.0976 | 5.48780                   | 1(1)                    |
| <b>Membrane-associated</b>                     |                                                                |        |                           |                         |
| Q0JQX6                                         | Plastidic glucose transporter 4                                | 24.960 | 36.9004                   | 8(8)                    |
| Q9LD54                                         | Envelope ADP, ATP carrier protein, chloroplastic-related       | 13.867 | 29.6588                   | 8(8)                    |
| Q9AWZ5                                         | Putative late embryogenesis-abundant protein                   | 7.0955 | 25.8278                   | 2(2)                    |
| Q0JRG3                                         | Receptor                                                       | 6.3667 | 17.5610                   | 2(2)                    |
| Q9FP98                                         | Mitochondrial import receptor subunit TOM7                     | 4.4897 | 21.25                     | 1(1)                    |
| Q9LGA3                                         | Transmembrane protein 214                                      | 4.0381 | 3.24232                   | 1(1)                    |
| Q6H4V4                                         | Cullin-associated NEDD8-dissociated protein 1                  | 3.5219 | 2.05254                   | 2(2)                    |
| Q6EUQ9                                         | V-type proton ATPase catalytic subunit A                       | 2.3942 | 2.41546                   | 1(1)                    |
| Q6H7E0                                         | Receptor, signaling molecule                                   | 1.6178 | 3.00300                   | 1(1)                    |
| Q0DY86                                         | Histidinol-phosphate aminotransferase 1, chloroplastic-related | 1.1865 | 3.76471                   | 1(1)                    |
| <b>Reticulata related-like</b>                 |                                                                |        |                           |                         |
| Q5VQR0                                         | Reticulata-related 2, chloroplastic-related                    | 20.840 | 20.6897                   | 4(4)                    |
| <b>Starch binding</b>                          |                                                                |        |                           |                         |
| Q6Z0Y8                                         | Protein Targeting to STarch (PTST)-related                     | 2.2595 | 6.86274                   | 1(1)                    |
| <b>Starch biosynthesis</b>                     |                                                                |        |                           |                         |
| A0A0N7KFE7                                     | 1,4-alpha-glucan-branching enzyme                              | 30.778 | 45.5556                   | 9(9)                    |
| <b>Stress response</b>                         |                                                                |        |                           |                         |
| Q5QMK7                                         | Phosphoglycerate mutase                                        | 25.391 | 19.3202                   | 8(8)                    |
| A0A0P0V093                                     | Exportin-2                                                     | 8.7347 | 11.2339                   | 1(1)                    |
| A0A0P0VLH5                                     | Acetolactate synthase small subunit 1, chloroplastic           | 6.6611 | 14.7436                   | 2(2)                    |
| Q8RZW7                                         | Methanethiol oxidase                                           | 6.2930 | 10.7884                   | 3(3)                    |
| Q5JK10                                         | Aldolase-type TIM barrel family protein                        | 5.9289 | 5.09259                   | 1(1)                    |
| Q6H660                                         | Putative stress-induced protein STI1                           | 4.1221 | 6.74740                   | 2(2)                    |
| Q94E74                                         | Adenine nucleotide alpha hydrolases-like superfamily protein   | 3.4226 | 9.58084                   | 1(1)                    |
| Q6H734                                         | DNA damage-inducible protein 1                                 | 1.9863 | 3.37349                   | 1(1)                    |
| <b>Transcriptional/translational machinery</b> |                                                                |        |                           |                         |
| Q93VC6                                         | 40S ribosomal protein s5                                       | 18.210 | 34.5000                   | 5(5)                    |
| Q6K1Q6                                         | 60S ribosomal protein I14                                      | 4.5851 | 16.4179                   | 2(2)                    |
| Q6ETK1                                         | Nucleoid-associated protein YBAB                               | 3.8794 | 13.5135                   | 2(2)                    |
| Q8S292                                         | Adenine nucleotide alpha hydrolase family                      | 2.2070 | 6.79012                   | 1(1)                    |
| Q94E63                                         | Alba chromosomal protein                                       | 1.5678 | 18.4210                   | 1(1)                    |
| Q6K667                                         | Ribosomal protein                                              | 1.3597 | 6.50406                   | 1(1)                    |
| B9F4A8                                         | 28S rRNA (cytosine-c(5))-methyltransferase-related             | 1.0135 | 7.72277                   | 1(1)                    |
| <b>Ubiquitin-mediated proteolysis</b>          |                                                                |        |                           |                         |
| Q8W0I1                                         | Ubiquitin-conjugating enzyme E2 36                             | 4.7198 | 25.4902                   | 2(2)                    |
| <b>Unknown</b>                                 |                                                                |        |                           |                         |
| Q6K2G6                                         | Putative (DUF 3339)-related                                    | 20.723 | 43.4783                   | 1(1)                    |
| Q8S9Z3                                         | Unknown                                                        | 14.350 | 32.0755                   | 2(2)                    |
| Q0DZE5                                         | Unknown                                                        | 4.7838 | 4.25532                   | 1(1)                    |
| A0A0P0V7T1                                     | Unknown                                                        | 3.3476 | 21.1765                   | 1(1)                    |
| Q9S7V0                                         | Unknown                                                        | 3.2783 | 72.5806                   | 1(1)                    |
| A0A0P0UXR0                                     | Unknown                                                        | 1.0687 | 19.3833                   | 1(1)                    |

<sup>a</sup>Percent protein sequence coverage by total peptides.<sup>b</sup>Number of total peptides (number of unique peptides)



**Table S3** Uncharacterized proteins in the distal proteome of microsieve-prepared starch granules

| UniProt ID                     | Description                                  | Score   | Coverage (%) <sup>a</sup> | # peptides <sup>b</sup> |
|--------------------------------|----------------------------------------------|---------|---------------------------|-------------------------|
| <b>Carbohydrate metabolism</b> |                                              |         |                           |                         |
| Q0JQX6                         | Plastidic glucose transporter 4              | 10.202  | 12.1771                   | 2(2)                    |
| Q0JKM8                         | Aspartic proteinase oryza-sin-1-like         | 1.7289  | 2.87356                   | 1(1)                    |
| Q0J1E1                         | C-1-tetrahydrofolate synthase, cytoplasmic   | 0.88875 | 5.94059                   | 1(1)                    |
| <b>Lipid metabolism</b>        |                                              |         |                           |                         |
| Q6ZK49                         | Chloroplast J-like domain 1                  | 0.91793 | 6.48464                   | 1(1)                    |
| <b>Membrane-associated</b>     |                                              |         |                           |                         |
| Q6ZHP6                         | Outer envelope membrane protein 7            | 1.5116  | 18.8119                   | 1(1)                    |
| Q67UK4                         | RING finger, H2 subclass family              | 0.95078 | 5.73394                   | 1(1)                    |
| <b>Miscellaneous</b>           |                                              |         |                           |                         |
| Q337M4                         | Vicinal oxygen chelate family                | 2.7695  | 8.51648                   | 1(1)                    |
| <b>Oxidoreductases</b>         |                                              |         |                           |                         |
| A0A0P0XPG5                     | Peroxisomal sarcosine oxidase                | 0.76675 | 8.17308                   | 1(1)                    |
| A0A0P0WTI0                     | FAD-dependent oxidoreductase family protein  | 0.64647 | 3.14607                   | 1(1)                    |
| <b>Pyruvate metabolism</b>     |                                              |         |                           |                         |
| Q7XLP7                         | 2,3-dimethylmalate lyase                     | 1.2426  | 6.16970                   | 1(1)                    |
| <b>Stress response</b>         |                                              |         |                           |                         |
| Q67VZ0                         | PLAT domain-containing protein 2             | 2.9527  | 8.77193                   | 1(1)                    |
| Q7FAT6                         | T-complex protein 1 subunit alpha chaperonin | 2.1599  | 3.85321                   | 1(1)                    |
| Q6ZJI3                         | Enzyme modulator                             | 0.65856 | 1.64609                   | 1(1)                    |
| Q6YTX5                         | Stress-response A/B barrel                   | 0.62672 | 4.59770                   | 1(1)                    |
| <b>Unknown</b>                 |                                              |         |                           |                         |
| A0A0P0VBK7                     | Unknown                                      | 1.7326  | 8.10811                   | 1(1)                    |

24 accession IDs could not be mapped.

<sup>a</sup>Percent protein sequence coverage by total peptides.

<sup>b</sup>Number of total peptides (number of unique peptides).

**Table S4** Uncharacterized proteins in the proximal amyloplasm of microsieve-prepared starch granules

| UniProt ID                                     | Description                           | Score   | Coverage (%) <sup>a</sup> | # peptides <sup>b</sup> |
|------------------------------------------------|---------------------------------------|---------|---------------------------|-------------------------|
| <b>Carbohydrate synthesis and metabolism</b>   |                                       |         |                           |                         |
| Q0JKM8                                         | Aspartic protease                     | 4.3530  | 7.47126                   | 2(2)                    |
| A0A0N7KFE7                                     | 1,4-alpha-glucan-branching enzyme     | 3.1593  | 18.8889                   | 2(2)                    |
| <b>Lipid metabolism</b>                        |                                       |         |                           |                         |
| B7FAF1                                         | Peroxygenase 3-related                | 2.5156  | 9.58333                   | 2(2)                    |
| C7J0T2                                         | Peroxygenase 1-related                | 1.8854  | 3.54839                   | 1(1)                    |
| Q7XVN6                                         | Dehydrogenase                         | 1.8502  | 6.79348                   | 2(2)                    |
| <b>Membrane-associated</b>                     |                                       |         |                           |                         |
| Q6ZHP6                                         | Outer envelope membrane protein 7     | 7.9338  | 31.6832                   | 2(2)                    |
| Q0E0Z7                                         | Transmembrane protein                 | 4.0085  | 44.9275                   | 2(2)                    |
| B7F8G3                                         | Translocator protein                  | 3.3189  | 12.9534                   | 1(1)                    |
| Q6ATF8                                         | Membrane traffic protein              | 2.4483  | 11.7647                   | 1(1)                    |
| Q0DQF2                                         | B12D protein                          | 2.3602  | 27.0833                   | 1(1)                    |
| Q2QM11                                         | Transmembrane protein                 | 2.0786  | 21.2766                   | 1(1)                    |
| B9EVR3                                         | Outer envelope pore protein 16-2      | 0.82594 | 11.6279                   | 1(1)                    |
| Q6EU87                                         | Transmembrane protein 208             | 0.80272 | 9.19540                   | 1(1)                    |
| <b>Miscellaneous</b>                           |                                       |         |                           |                         |
| Q0DEP9                                         | Early nodulin 93                      | 2.5183  | 15.1260                   | 1(1)                    |
| <b>Seed reserve</b>                            |                                       |         |                           |                         |
| Q0DS36                                         | Cupin-like superfamily                | 3.1558  | 6.82493                   | 2(2)                    |
| Q0DJ38                                         | Prolamin PPROL 14E-like               | 1.5080  | 25.4902                   | 2(2)                    |
| <b>Stress response</b>                         |                                       |         |                           |                         |
| B7EME6                                         | Universal stress protein PHOS32       | 1.9379  | 9.52381                   | 2(2)                    |
| Q8LQJ5                                         | NDR1/HIN1-like protein 6              | 0.99140 | 2.74914                   | 1(1)                    |
| Q2R1P5                                         | Disease resistance protein Pik-2-like | 0.75399 | 0.773558                  | 1(1)                    |
| <b>Transcriptional/translational machinery</b> |                                       |         |                           |                         |
| Q0JAC6                                         | 60S ribosomal protein l7              | 0.87031 | 4.09836                   | 1(1)                    |
| Q0E4R7                                         | 60S ribosomal protein l9-related      | 0.78094 | 5.20833                   | 1(1)                    |
| <b>Unknown</b>                                 |                                       |         |                           |                         |
| A0A0P0VUB4                                     | Unknown                               | 22.586  | 17.4680                   | 7(7)                    |
| Q6K2G6                                         | Protein, putative (DUF 3339)-related  | 9.0261  | 43.4783                   | 1(1)                    |
| Q9S7V0                                         | Unknown                               | 3.5224  | 54.8387                   | 1(1)                    |
| Q8S9Z3                                         | Unknown                               | 1.4412  | 14.1509                   | 1(1)                    |
| Q8S2H7                                         | Unknown                               | 1.07915 | 9.11854                   | 1(1)                    |
| A0A0N7KGG8                                     | Unknown                               | 0.90309 | 8.97959                   | 1(1)                    |
| A0A0P0XY21                                     | Unknown                               | 0.87290 | 24.8175                   | 1(1)                    |
| Q6K313                                         | Unknown                               | 0.61961 | 6.72269                   | 1(1)                    |

4 accession IDs could not be mapped.

<sup>a</sup>Percent protein sequence coverage by total peptides.

<sup>b</sup>Number of total peptides (number of unique peptides).

**Table S5** Uncharacterized proteins in the distal proteome of flotation-prepared starch granules

| UniProt ID                            | Description                          | Score   | Coverage (%) <sup>a</sup> | # peptides <sup>b</sup> |
|---------------------------------------|--------------------------------------|---------|---------------------------|-------------------------|
| <b>Miscellaneous</b>                  |                                      |         |                           |                         |
| Q6Z7F7                                | F-box protein                        | 0.51456 | 4.98301                   | 1(1)                    |
| <b>Ubiquitin-mediated proteolysis</b> |                                      |         |                           |                         |
| Q10LG3                                | Probable E3 ubiquitin-protein ligase | 0.53970 | 5.30035                   | 1(1)                    |
| <b>Unknown</b>                        |                                      |         |                           |                         |
| Q6ZKA9                                | Unknown                              | 0.87877 | 8.47458                   | 1(1)                    |
| A0A0P0Y1U1                            | Unknown                              | 0.56272 | 62.0690                   | 1(1)                    |

3 accession IDs could not be mapped.

<sup>a</sup>Percent protein sequence coverage by total peptides.

<sup>b</sup>Number of total peptides (number of unique peptides).

**Table S6** Uncharacterized proteins in the proximal amyloplasm of flotation-prepared starch granules

| UniProt ID                                     | Description                                   | Score   | Coverage (%) <sup>a</sup> | # peptides <sup>b</sup> |
|------------------------------------------------|-----------------------------------------------|---------|---------------------------|-------------------------|
| <b>Carbohydrate metabolism</b>                 |                                               |         |                           |                         |
| Q0JQX6                                         | Plastidic glucose transporter 4               | 4.9447  | 12.7306                   | 2(2)                    |
| Q0JKM8                                         | Aspartic protease                             | 0.90588 | 4.59770                   | 1(1)                    |
| <b>Lipid metabolism</b>                        |                                               |         |                           |                         |
| A0A0P0WFP9                                     | Fatty acid export 2, chloroplastic            | 0.68782 | 14.3322                   | 1(1)                    |
| <b>Membrane-associated</b>                     |                                               |         |                           |                         |
| Q6ZHP6                                         | Outer envelope membrane protein 7             | 5.1405  | 25.7426                   | 1(1)                    |
| Q9LGA3                                         | Transmembrane protein 214                     | 1.1700  | 2.38910                   | 1(1)                    |
| <b>Miscellaneous</b>                           |                                               |         |                           |                         |
| Q0DEP9                                         | Early nodulin 93                              | 1.5173  | 15.1260                   | 1(1)                    |
| <b>Seed reserve</b>                            |                                               |         |                           |                         |
| Q0DS36                                         | Cupin-1                                       | 1.3606  | 4.15430                   | 1(1)                    |
| <b>Transcriptional/translational machinery</b> |                                               |         |                           |                         |
| Q7XKI6                                         | Ribosomal RNA small subunit methyltransferase | 1.5626  | 7.98817                   | 1(1)                    |
| <b>Unknown</b>                                 |                                               |         |                           |                         |
| Q7XLP6                                         | Unknown                                       | 1.0810  | 10.9489                   | 1(1)                    |
| A0A0P0X2W9                                     | Unknown                                       | 0.57900 | 6.85279                   | 1(1)                    |

<sup>a</sup>Percent protein sequence coverage by the total peptides.

<sup>b</sup>Number of total peptides (number of unique peptides).

**Dataset S1** Total trypsin-shaved proteome from dispersion method-prepared granules

**Dataset S2** Total trypsin-shaved proteome from microsieve method-prepared granules

**Dataset S3** Total trypsin-shaved proteome from flotation method-prepared granules

**Dataset S4** Total isopropanol-solubilized proteome from dispersion method-prepared granules

**Dataset S5** Total isopropanol-solubilized proteome from microsieve method-prepared granules

**Dataset S6** Total isopropanol-solubilized proteome from flotation method-prepared granules

**Dataset S7** Peptides unique to the trypsin-shaved proteome from dispersion method-prepared granules

**Dataset S8** Peptides unique to the trypsin-shaved proteome from microsieve method-prepared granules

**Dataset S9** Peptides unique to the trypsin-shaved proteome from flotation method-prepared granules

**Dataset S10** Peptides unique to the isopropanol-solubilized proteome from dispersion method-prepared granules

**Dataset S11** Peptides unique to the isopropanol-solubilized proteome from microsieve method-prepared granules

**Dataset S12** Peptides unique to the isopropanol-solubilized proteome from flotation method-prepared granules

## References

- Heberle H, Meirelles GV, da Silva FR, Telles GP, Minghim R (2015) InteractiVenn: a web-based tool for the analysis of sets through Venn diagrams BMC Bioinformatics 16:169 doi:10.1186/s12859-015-0611-3
- Mi H, Muruganujan A, Ebert D, Huang X, Thomas PD (2018) PANTHER version 14: more genomes, a new PANTHER GO-slim and improvements in enrichment analysis tools Nucleic Acids Res 47:D419-D426 doi:10.1093/nar/gky1038
